# Supplementary material for: The Development of Surface-Modified Liposomes as an Intranasal Delivery System for Group A Streptococcus Vaccines
Source: MDPI journal article supplement (doi:10.3390/vaccines11020305), 2023-01-30
Supplement: s1 [file s1]

# The Development of Surface-Modified Liposomes as an Intranasal Delivery System for Group A *Streptococcus* Vaccines

Jieru Yang <sup>1</sup>, Jennifer C. Boer <sup>2</sup>, Mattaka Khongkow <sup>3</sup>, Sarunya Phunpee <sup>3</sup>, Zeinab G. Khalil <sup>4</sup>, Sahra Bashiri <sup>1</sup>, Cyril Deceneux <sup>2</sup>, Georgia Goodchild <sup>2</sup>, Waleed M. Hussein <sup>1</sup>, Robert J. Capon <sup>4</sup>, Uracha Ruktanonchai <sup>3</sup>, Magdalena Plebanski <sup>2</sup>, Istvan Toth <sup>1,4,5</sup> and Mariusz Skwarczynski <sup>1,\*</sup>

<sup>1</sup> School of Chemistry and Molecular Biosciences, The University of Queensland, St. Lucia, QLD 4072, Australia

<sup>2</sup> School of Health and Biomedical Sciences, RMIT University, Bundoora, Melbourne, VIC 3083, Australia

<sup>3</sup> National Nanotechnology Center (NANOTEC), National Science and Technology Development Agency (NSTDA), 111 Thailand Science Park, Phahonyothin Road, Klong 1, Pathumthani 12120, Thailand

<sup>4</sup> Institute for Molecular Bioscience, The University of Queensland, St. Lucia, QLD 4072, Australia

<sup>5</sup> School of Pharmacy, The University of Queensland, Woolloongabba, QLD 4102, Australia

\* Correspondence: m.skwarczynski@uq.edu.au; Tel.: +61-73-346-9894

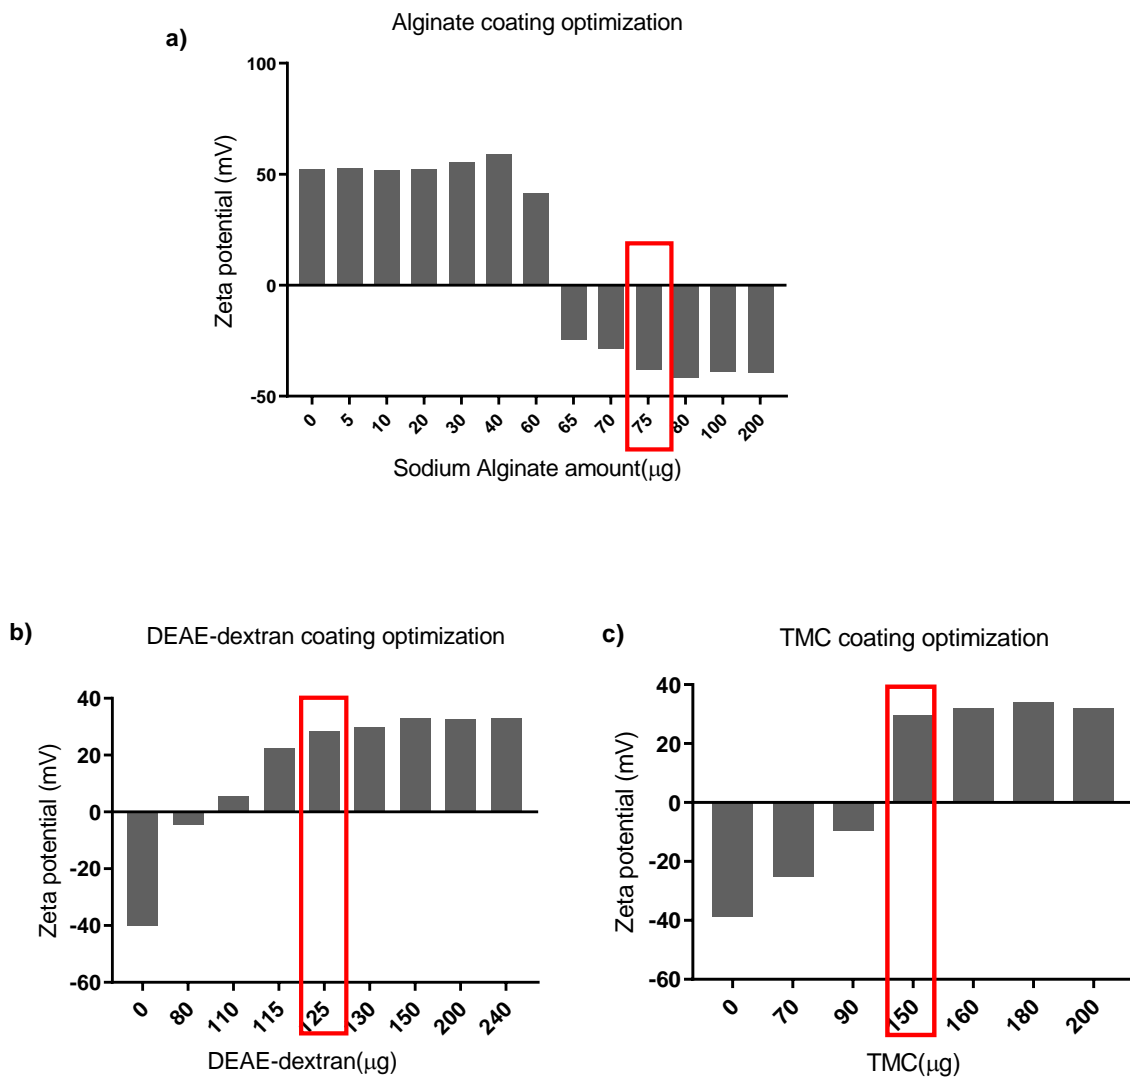

**Figure S1.** Coating of polyelectrolyte-coated liposomes. Effect of concentration of sodium alginate, TMC and DEAE-dextran on zeta potentials of LCP-1 loaded liposome formulation. Zeta potential changes during coating of liposome with a) sodium alginate; b) DEAE-dextran; c) with TMC. Red box mark values selected for final liposomes coating.

a)

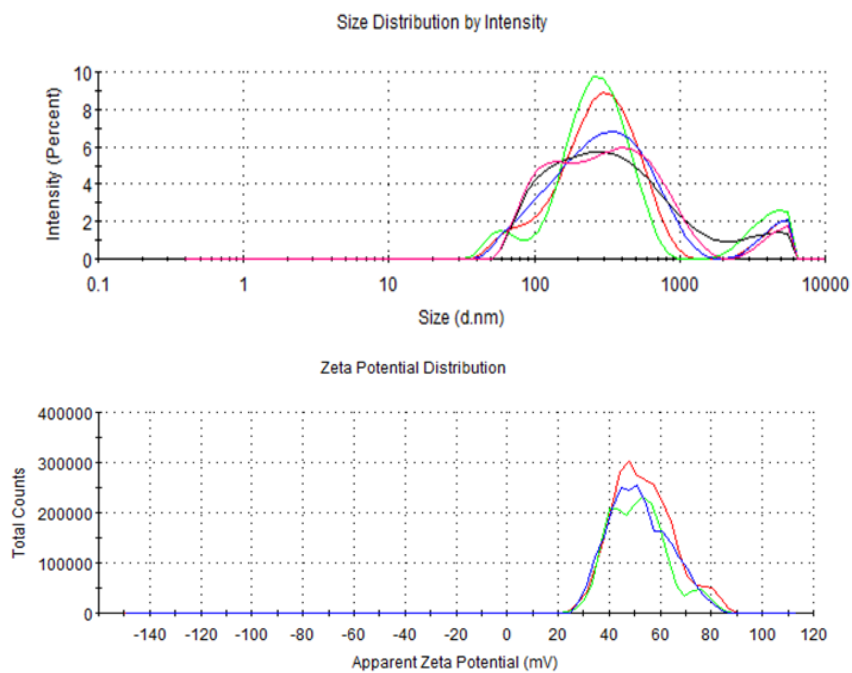

| Liposomes | Coating/anchored moieties | Particle size (nm)     | Polydispersity index (PDI) | Zeta potential (mV) |
|-----------|---------------------------|------------------------|----------------------------|---------------------|
| <b>L1</b> | lipoKALA                  | Peak 1: $96 \pm 45$    | $0.42 \pm 0.02$            | $57 \pm 2$          |
|           |                           | Peak 2: $379 \pm 83$   |                            |                     |
|           |                           | Peak 3: $4273 \pm 286$ |                            |                     |

b)

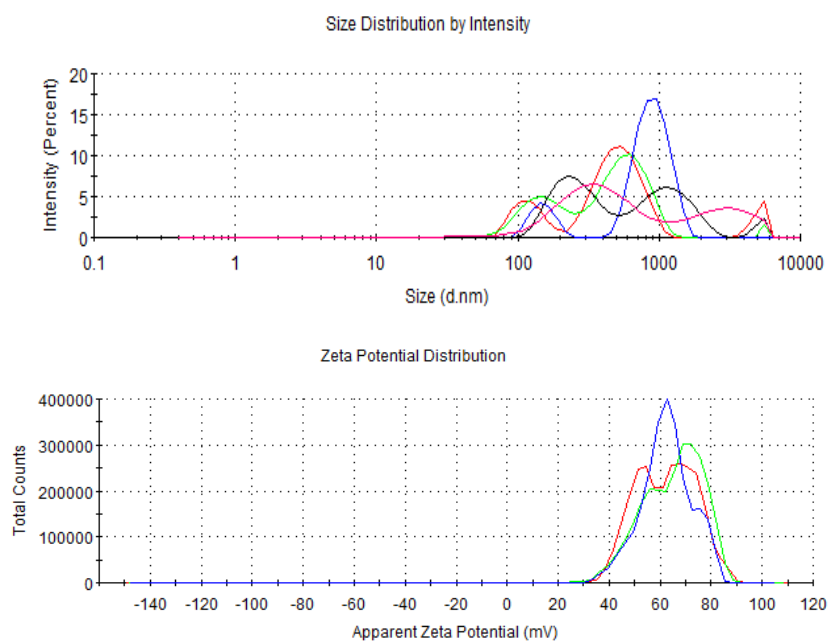

| Liposomes | Coating/anchored moieties | Particle size (nm)      | Polydispersity index (PDI) | Zeta potential (mV) |
|-----------|---------------------------|-------------------------|----------------------------|---------------------|
| <b>L2</b> | OTMC                      | Peak 1: $250 \pm 227$   | $0.51 \pm 0.04$            | $63 \pm 2$          |
|           |                           | Peak 2: $641 \pm 421$   |                            |                     |
|           |                           | Peak 3: $4645 \pm 1202$ |                            |                     |

c)

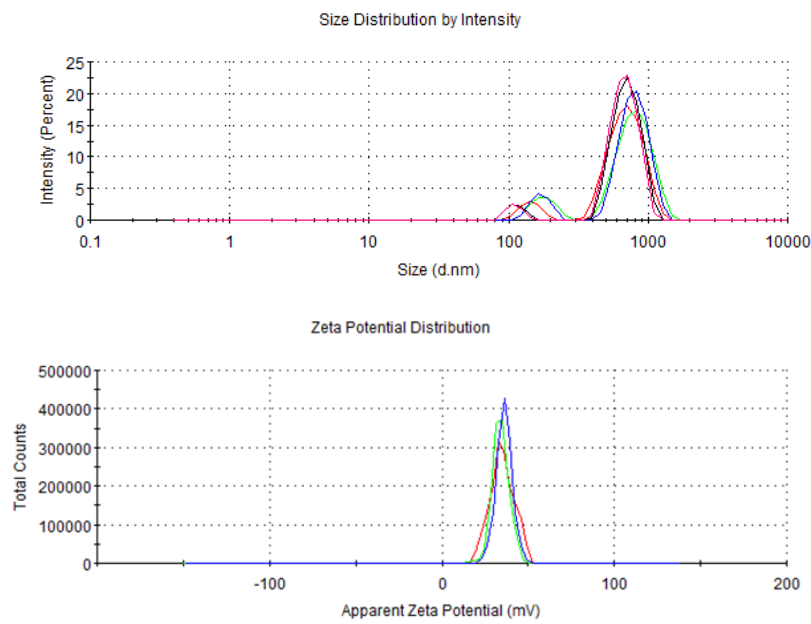

| Liposomes | Coating/anchored moieties | Particle size (nm)    | Polydispersity index (PDI) | Zeta potential (mV) |
|-----------|---------------------------|-----------------------|----------------------------|---------------------|
| <b>L3</b> | lipoPEI                   | Peak 1: $184 \pm 116$ | $0.61 \pm 0.03$            | $63 \pm 2$          |
|           |                           | Peak 2: $694 \pm 156$ |                            |                     |

d)

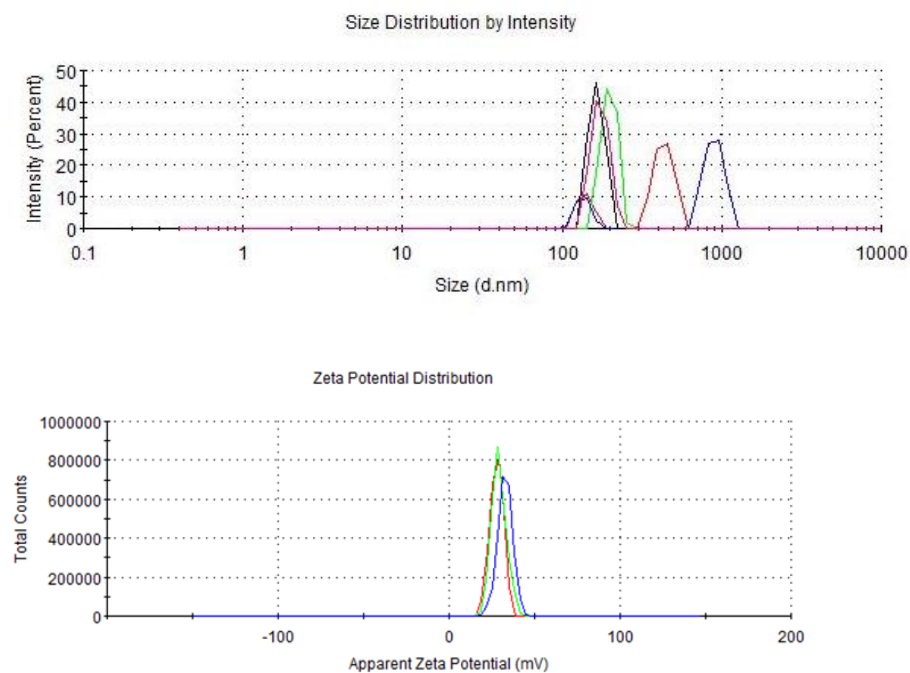

| Liposomes | Coating/anchored moieties | Particle size range (nm) | Polydispersity index (PDI) | Zeta potential (mV) |
|-----------|---------------------------|--------------------------|----------------------------|---------------------|
| <b>L4</b> | alginate/DEAE-dextran     | Peak 1: $164 \pm 26$     | $0.46 \pm 0.33$            | $30 \pm 2$          |
|           |                           | Peak 2: $667 \pm 329$    |                            |                     |

e)

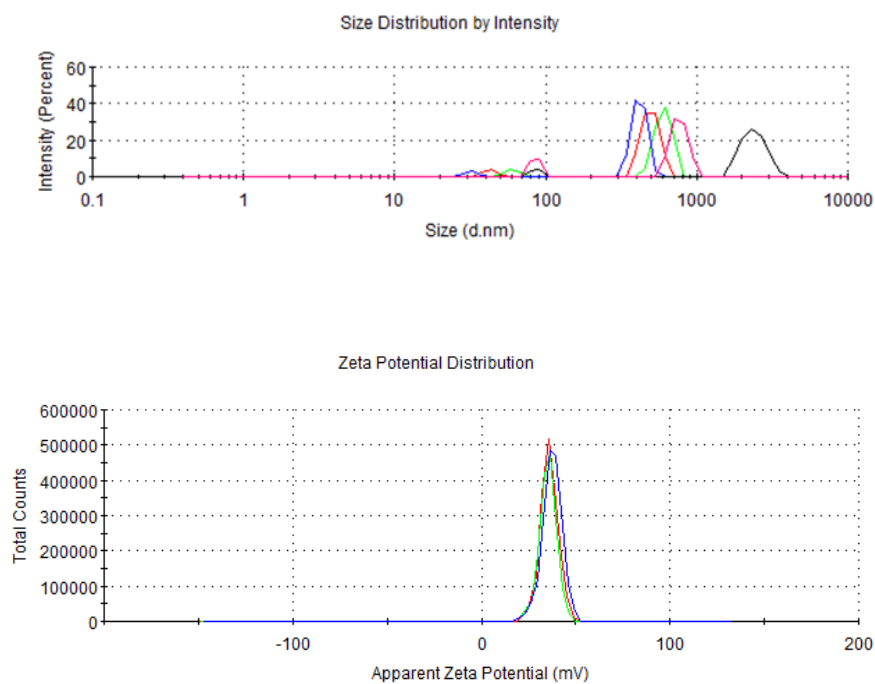

| Liposomes | Coating/anchored moieties | Particle size range (nm) | Polydispersity index (PDI) | Zeta potential (mV) |
|-----------|---------------------------|--------------------------|----------------------------|---------------------|
| <b>L5</b> | alginate/TMC              | Peak 1: $61 \pm 25$      | $0.64 \pm 0.13$            | $36 \pm 1$          |
|           |                           | Peak 2: $935 \pm 824$    |                            |                     |

**Figure S2.** DLS spectra of particles of a) **L1**, b) **L2**, c) **L3**, d) **L4**, e) **L5**. Size distributions by intensity, PDI and zeta potential.

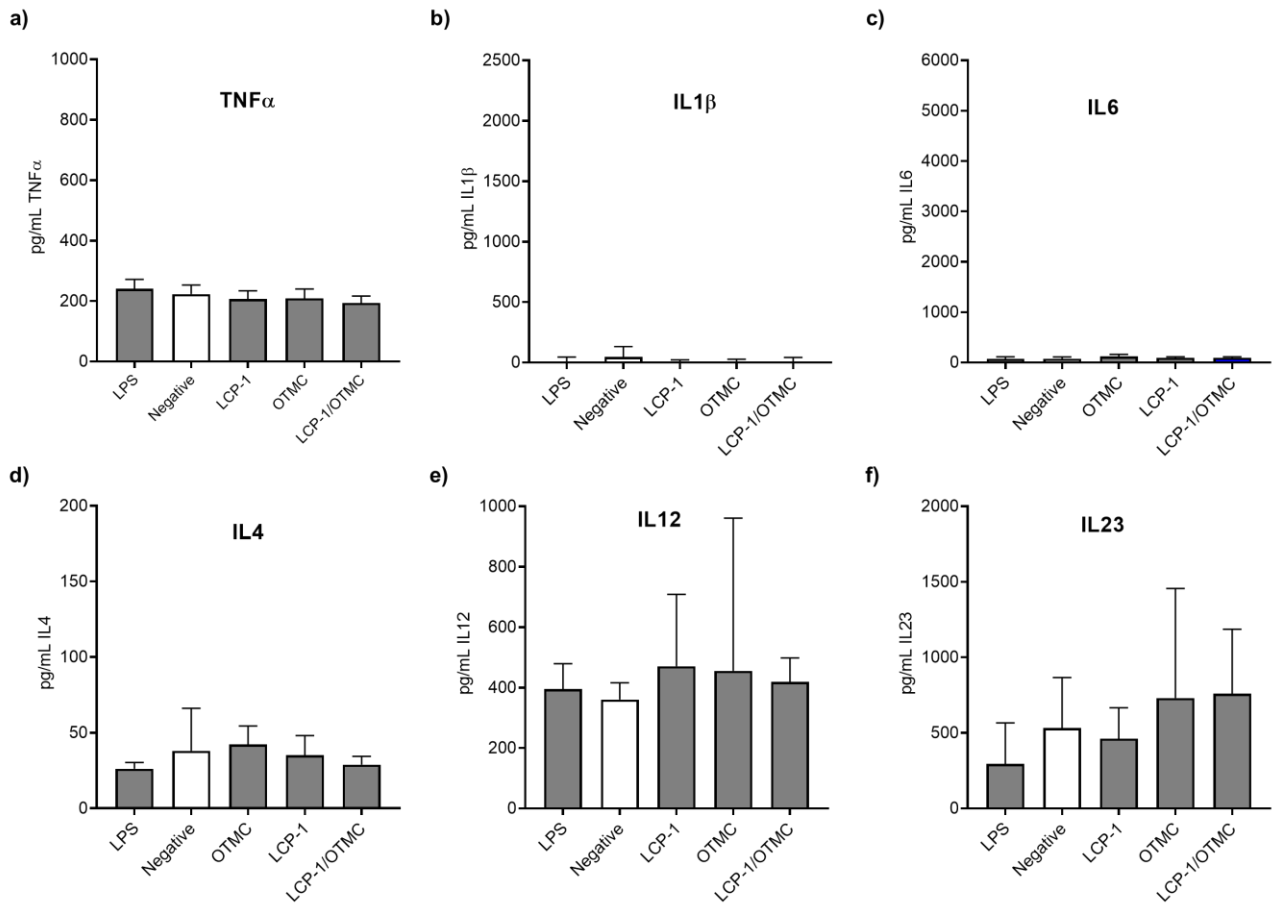

**Figure S3.** Production of a) TNF $\alpha$ ; b) IL-1 $\beta$ ; c) IL6; d) IL4; e) IL12; and IL23 cytokines following stimulation of BMDC in cold controlled conditions (4°C). Stimulation was performed with LPS, none (negative control), OTMC, LCP-1, and OTMC mixed with LCP-1. No any significant difference between the groups were detected.
